# Supplementary material for: Global CO2 emissions from dry inland waters share common drivers across ecosystems
Source: PubMed Central journal article supplement (PMC7195363; doi:10.1038/s41467-020-15929-y), 2020-05-01
Supplement: 41467_2020_15929_MOESM1_ESM.pdf [file 41467_2020_15929_MOESM1_ESM.pdf]

**Supplementary Information for**  
**Global CO<sub>2</sub> emissions from dry inland waters**  
**share common drivers across ecosystems**

**by**

**Keller et al.**

# Supplementary Tables

**Supplementary Table 1: CO<sub>2</sub> fluxes (FCO<sub>2</sub>) from dry and inundated inland water systems in the literature. Shown is the mean  $\pm$  standard deviation.**

| System, condition and location                              | FCO <sub>2</sub> (mmol m <sup>-2</sup> d <sup>-1</sup> ) | Reference                                 |
|-------------------------------------------------------------|----------------------------------------------------------|-------------------------------------------|
| <b>Dry</b>                                                  |                                                          |                                           |
| Drawdown area of Nam Theun 2 reservoir, Laos                | 279 $\pm$ 27                                             | Deshmukh et al., (2018) <sup>1</sup>      |
| Drawdown area of CDU reservoir, wet season, Brazil          | 155                                                      | Almeida et al. (2019) <sup>2</sup>        |
| Drawdown area of CDU reservoir, dry season, Brazil          | 203                                                      | Almeida et al. (2019) <sup>2</sup>        |
| Intermittent kettle holes, dry phase, Germany               | 89 $\pm$ 20                                              | Reverey et al., (2018) <sup>3</sup>       |
| Intermittent ponds, annual cycle, Spain                     | 48 $\pm$ 36                                              | Catalan et al., (2014) <sup>4</sup>       |
|                                                             | 149 $\pm$ 111                                            | Obrador et al., (2018) <sup>5</sup>       |
| Dry areas of Boadella reservoir, summer, Spain              | 216 $\pm$ 177                                            | Gómez-Gener et al., (2015) <sup>6</sup>   |
| Dry areas of Soyang reservoir, extreme drought, South Korea | 515 $\pm$ 377                                            | Jin et al., (2016) <sup>7</sup>           |
| Intermittent streams, summer, USA                           | 44 $\pm$ 23                                              | Gallo et al., (2014) <sup>8</sup>         |
| Intermittent streams, after rain event, USA                 | 569 $\pm$ 530                                            | Gallo et al., (2014) <sup>8</sup>         |
| Intermittent streams, summer, Spain                         | 781 $\pm$ 390                                            | Gómez-Gener et al., (2016) <sup>9</sup>   |
| Intermittent stream, summer dry-wet cycles, Australia       | 72 $\pm$ 27                                              | Looman et al. (2017) <sup>10</sup>        |
| Intermittent streams, Spring & Summer, Italy                | 2.7 – 60.1                                               | Bolpagni et al. (2016) <sup>11</sup>      |
| <b>Inundated</b>                                            |                                                          |                                           |
| Ponds, global estimate                                      | 35 $\pm$ 5.21                                            | Holgerson & Raymond, (2016) <sup>12</sup> |
| Lakes, global estimate                                      | 18                                                       | Raymond et al., (2013) <sup>13</sup>      |
| Reservoirs, global estimate                                 | 28 $\pm$ 37                                              | Deemer et al., (2016) <sup>14</sup>       |
| Streams, global estimate                                    | 663                                                      | Raymond et al., (2013) <sup>13</sup>      |

**Supplementary Table 2: Results from linear mixed effects models of CO<sub>2</sub> emission (FCO<sub>2</sub>). Estimates (B) and 95% confidence intervals (CI) are reported. Variables were log<sub>10</sub>- and z-transformed prior to analysis.**

| Fixed parts                                | FCO <sub>2</sub> |               |
|--------------------------------------------|------------------|---------------|
|                                            | <i>B</i>         | <i>CI</i>     |
| (Intercept)                                | 0.04             | -0.13 – 0.22  |
| Elevation                                  | -0.22            | -0.36 – -0.08 |
| Latitude                                   | 0.25             | 0.05 – 0.44   |
| Conductivity                               | -0.14            | -0.26 – 0.02  |
| Temperature                                | 0.3              | 0.18 – 0.42   |
| Moisture                                   | 0.4              | 0.26 – 0.51   |
| Organic matter                             | 0.3              | 0.17 – 0.41   |
| Interaction<br>(Moisture : Organic matter) | 0.23             | 0.14 – 0.32   |
| Interaction<br>(Moisture : Temperature)    | 0.12             | 0.02 – 0.22   |
| Random parts                               |                  |               |
| $\sigma$                                   | 0.47             |               |
| $\sigma_{\text{Team}}$                     | 0.13             |               |

**Supplementary Table 3: Global estimate of CO<sub>2</sub> fluxes from dry inland waters. Shown is the mean  $\pm$  standard deviation.**

| Type of system     | Accumulated dry area during a year<br>(including seasonal and permanent drying)<br>(km <sup>2</sup> ) | CO <sub>2</sub> emission rate<br>(mmol m <sup>-2</sup> d <sup>-1</sup> ) | Global C emission<br>(Pg C y <sup>-1</sup> ) |
|--------------------|-------------------------------------------------------------------------------------------------------|--------------------------------------------------------------------------|----------------------------------------------|
| Streams and rivers | 84,461 <sup>13</sup>                                                                                  | 128 $\pm$ 218                                                            | 0.047 $\pm$ 0.081                            |
| Lakes, reservoirs  | 187,542 <sup>15</sup>                                                                                 | 207 $\pm$ 405                                                            | 0.052 $\pm$ 0.1                              |
| Ponds              | 18,390 <sup>15</sup>                                                                                  | 267 $\pm$ 221                                                            | 0.022 $\pm$ 0.018                            |
| Total              | 290,393                                                                                               |                                                                          | 0.12 $\pm$ 0.13                              |

**Supplementary Table 4: Environmental variables used for modeling CO<sub>2</sub> emissions.**

| <b>Variable</b>         | <b>Source</b>               | <b>Present in final model</b> |
|-------------------------|-----------------------------|-------------------------------|
| Sediment temperature    | Measured <i>in situ</i>     |                               |
| LOI                     | Measured <i>in situ</i>     | X                             |
| Moisture                | Measured <i>in situ</i>     | X                             |
| pH                      | Measured <i>in situ</i>     |                               |
| Conductivity            | Measured <i>in situ</i>     | X                             |
| Texture                 | Measured <i>in situ</i>     |                               |
| Air temperature         | Measured <i>in situ</i>     | X                             |
| Elevation               | Determined locally          | X                             |
| Latitude                | Determined locally          | X                             |
| Type of system          | Determined locally          |                               |
| Annual precipitation    | Worldclim <sup>16</sup>     |                               |
| Annual mean temperature | Worldclim <sup>16</sup>     |                               |
| Climate zone            | Köppen-Geiger <sup>17</sup> |                               |

# Supplementary Figures

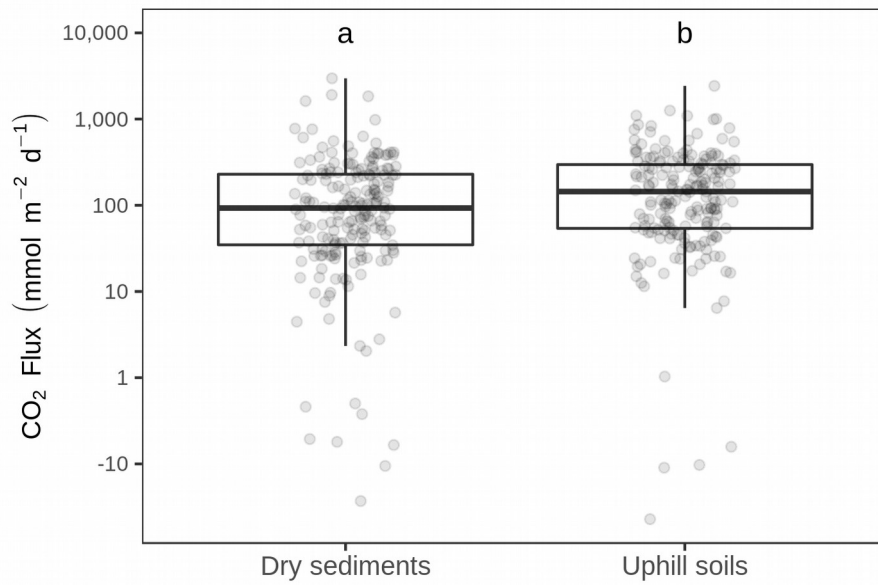

**Supplementary Figure 1: CO<sub>2</sub> flux from dry inland waters and uphill soils.** Box = 25th and 75th percentiles, whiskers = 1.5 \* inter-quartile range. Black line = median. Letters indicate significant differences between systems. (Wilcoxon signed rank test,  $P < 0.05$ ). Note log<sub>10</sub>-scale in y-axis.

## Supplementary References

1. Deshmukh, C. *et al.* Carbon dioxide emissions from the flat bottom and shallow Nam Theun 2 Reservoir: drawdown area as a neglected pathway to the atmosphere. *Biogeosciences* **15**, 1775–1794 (2018).
2. Almeida, R. M. *et al.* Carbon dioxide emission from drawdown areas of a Brazilian reservoir is linked to surrounding land cover. *Aquat. Sci.* **81**, 68 (2019).
3. Reverey, F. *et al.* Dry-wet cycles of kettle hole sediments leave a microbial and biogeochemical legacy. *Sci. Total Environ.* **627**, 985–996 (2018).
4. Catalan, N. *et al.* Carbon dioxide efflux during the flooding phase of temporary ponds. *Limnetica* **33**, 349–359 (2014).
5. Obrador, B. *et al.* Dry habitats sustain high CO<sub>2</sub> emissions from temporary ponds across seasons. *Sci. Rep.* **8**, 3015 (2018).
6. Gómez-Gener, L. *et al.* Hot spots for carbon emissions from Mediterranean fluvial networks during summer drought. *Biogeochemistry* **125**, 409–426 (2015).
7. Jin, H. *et al.* Enhanced greenhouse gas emission from exposed sediments along a hydroelectric reservoir during an extreme drought event. *Environ. Res. Lett.* **11**, 124003 (2016).
8. Gallo, E. L., Lohse, K. A., Ferlin, C. M., Meixner, T. & Brooks, P. D. Physical and biological controls on trace gas fluxes in semi-arid urban ephemeral waterways. *Biogeochemistry* **121**, 189–207 (2014).
9. Gómez-Gener, L. *et al.* When Water Vanishes: Magnitude and Regulation of Carbon Dioxide Emissions from Dry Temporary Streams. *Ecosystems* **19**, 710–723 (2016).
10. Looman, A., Maher, D. T., Pendall, E., Bass, A. & Santos, I. R. The carbon dioxide evasion cycle of an intermittent first-order stream: contrasting water–air and soil–air exchange. *Biogeochemistry* (2016).
11. Bolpagni, R., Folegot, S., Laini, A. & Bartoli, M. Role of ephemeral vegetation of emerging river bottoms in modulating CO<sub>2</sub> exchanges across a temperate large lowland river stretch. *Aquat. Sci.* **79**, 149–158 (2017).
12. Holgerson, M. A. & Raymond, P. A. Large contribution to inland water CO<sub>2</sub> and CH<sub>4</sub> emissions from very small ponds. *Nat. Geosci.* **9**, 222–226 (2016).

13. Raymond, P. A. *et al.* Global carbon dioxide emissions from inland waters. *Nature* **503**, 355–359 (2013).
14. Deemer, B. R. *et al.* Greenhouse Gas Emissions from Reservoir Water Surfaces: A New Global Synthesis. *BioScience* **66**, 949–964 (2016).
15. Marcé, R. *et al.* Emissions from dry inland waters are a blind spot in the global carbon cycle. *Earth-Sci. Rev.* **188**, 240–248 (2019).
16. Fick, S. E. & Hijmans, R. J. WorldClim 2: new 1-km spatial resolution climate surfaces for global land areas. *Int. J. Climatol.* **37**, 4302–4315 (2017).
17. Kotték, M., Grieser, J., Beck, C., Rudolf, B. & Rubel, F. World Map of the Köppen-Geiger climate classification updated. *Meteorol. Z.* **15**, 259–263 (2006).
